# Supplementary material for: Promising Tools to Facilitate the Implementation of TDM of Biologics in Clinical Practice
Source: MDPI journal article supplement (doi:10.3390/jcm11113011), 2022-05-26
Supplement: s1 [file s1]

**Supplementary Figure S1. Written instruction (in Dutch) for patients for home sampling by use of VAMS after finger prick**

|                                                                                                                                                                                              |                                                                                    |                                                                                                                                                                                                                                                                                                                                                                     |                                                                                     |                                                                                                                                                                                                                                                 |                                                                                      |
|----------------------------------------------------------------------------------------------------------------------------------------------------------------------------------------------|------------------------------------------------------------------------------------|---------------------------------------------------------------------------------------------------------------------------------------------------------------------------------------------------------------------------------------------------------------------------------------------------------------------------------------------------------------------|-------------------------------------------------------------------------------------|-------------------------------------------------------------------------------------------------------------------------------------------------------------------------------------------------------------------------------------------------|--------------------------------------------------------------------------------------|
| Instructieformulier voor het uitvoeren van de vingerprikmethode ; gebaseerd op Neoteryx® en Capiou/Veenhof et al.                                                                            |                                                                                    |                                                                                                                                                                                                                                                                                                                                                                     |                                                                                     | © UZ Gent                                                                                                                                                                                                                                       |                                                                                      |
| <b>Stap 1: Labelen</b><br>Vul in op het label van het zakje:<br>- je studienummer (vb. ADM-001)<br>- datum van de bloedafname<br>- datum van de zending per post.                            |   | <b>Stap 5: Prikpen &amp; vingerprik</b><br>Draai de knop van de prikpen (lancet) af. Kies uw prikplaats aan de zijkant van de ring- of middelvinger en ontsmet. Hou de prikpen vast tussen uw vingers. Druk de prikpen stevig tegen de prikplaats tot u een klik hoort of de prik voelt. Verwijder erna de prikpen. Gooi de prikpen nadien weg. (éénmalig gebruik). |   | <b>Stap 9: 2de druppel verzamelen</b><br>Herhaal stap 6 t.e.m. 8 voor de 2de druppel te verzamelen. Indien onvoldoende bloed om de tweede Mitra tip te vullen, herhaal vanaf stap 5 met de tweede prikpen (lancet).                             |   |
| <b>Stap 2: Voorbereiding</b><br>Leg alle benodigdheden op een vlakke en schone ondergrond. Neem de Mitra tips enkel vast aan de onderkant! (Het filtertippje is gevoelig voor besmettingen). |   | <b>Stap 6: Bloed stuwen</b><br>Masseer de geprikte vinger vanaf de handpalm tot aan het bovenste vingerkootje. Niet persen. Indien er geen bloed zichtbaar is, herhaal stap 5 met de tweede prikpen (lancet).                                                                                                                                                       |   | <b>Stap 10: Verzorgen</b><br>Veeg uw vinger schoon en plak de pleister.                                                                                                                                                                         |   |
| <b>Stap 3: Wassen</b><br>Was uw handen met zeep en warm water en droog uw handen goed af.                                                                                                    |   | <b>Stap 7: 1ste druppel wegvegen</b><br>Na de vingerprik, veeg de eerste bloeddruppel af met de wattenbol.                                                                                                                                                                                                                                                          |   | <b>Stap 11: Sluiten</b><br>Plaats de Mitra tips in de plastic houder en sluit af. Laat de Mitra tips minimum 24 u aan de lucht drogen in de houder op kamertemperatuur. (NIET op radiator of direct zonlicht)                                   |   |
| <b>Stap 4: Verwarmen</b><br>Maak uw vingers goed warm. Dit kunt u doen door een vuist te maken of door 20 - 30 seconden in uw handen te wrijven.                                             |  | <b>Stap 8: Bloed verzamelen</b><br>Breng de druppel bloed in contact met de Mitra tip, zonder dat tip de vinger raakt. Wacht totdat de tip VOLLEDIG rood is. Indien niet volledig rood, herhaal vanaf stap 6. <b>Opmerking:</b> Het is OK om de tip meerdere keren in contact te brengen met de bloeddruppel totdat deze volledig gevuld is.                        |  | <b>Stap 12: Pakket &amp; verzenden</b><br>Plaats de Mitra tips (in de plastic houder) samen met het silicagel zakje (droogmiddel) in het plastic zakje en sluit het zakje goed af. <b>Stuur het zakje terug in de voorgefrankeerde envelop.</b> |  |

## Supplementary Table S1

**Table S1.** Lateral Flow Testing results of adalimumab concentrations in SUPRA-A trial participants

|            | Week | Adalimumab<br>b (µg/ml)<br>M1 | Adalimumab<br>b (µg/ml)<br>M2 | Mean ± SD  | CV (%) |
|------------|------|-------------------------------|-------------------------------|------------|--------|
| Patient A* | 0    | 7.4                           | 7.4                           | 7.4 ± 0.0  | 0.0    |
|            | 13   | 5.1                           | 4.9                           | 5.0 ± 0.1  | 2.8    |
| Patient B  | 0    | 9.7                           | 9.6                           | 9.7 ± 0.1  | 0.7    |
| Patient C  | 0    | 8.1                           | 9.4                           | 8.8 ± 0.9  | 10.5   |
| Patient D* | 0    | 13.2                          | 16.2                          | 14.7 ± 2.1 | 14.4   |
|            | 13   | 8.3                           | 6.6                           | 7.5 ± 1.2  | 16.1   |
| Patient E* | 0    | 8.4                           | 8.2                           | 8.3 ± 0.1  | 1.7    |
|            | 13   | 2.9                           | 3.3                           | 3.1 ± 0.3  | 9.1    |
| Patient F* | 0    | 15.6                          | 10.9                          | 13.3 ± 3.3 | 25.1   |
|            | 13   | 4.7                           | 4.6                           | 4.7 ± 0.1  | 1.5    |
| Patient G  | 0    | 6.1                           | 6.7                           | 6.4 ± 0.4  | 6.6    |
| Patient H* | 0    | 9.1                           | 7.9                           | 8.5 ± 0.8  | 10.0   |
|            | 13   | 5.8                           | 6.2                           | 6.0 ± 0.3  | 4.7    |
| Patient I* | 0    | 9.3                           | 8.7                           | 9.0 ± 0.4  | 4.7    |
|            | 13   | NA                            | NA                            | NA         | NA     |
| Patient J  | 0    | 9.2                           | 8.4                           | 8.8 ± 0.6  | 6.4    |

Abbreviations and symbols: M1,2 - measurement; SD - standard deviation; CV - coefficient of variation; \*participant randomized to dose reduction arm; NA – Sample not available due to drop-out before sampling timepoint.
